# Supplementary material
Source: publisher figshare collection journal article supplement (https://sage.figshare.com/ndownloader/files/12461915)

**Supplement Figure 1.** Flowchart of the recruitment procedure.

CATTS = The Child and Adolescent Twin Study in Sweden, DOGGS = Developmental Outcomes for Neurodevelopmental Problems in a Genetic twin Study in Sweden, QbTest = Quantified behavioral test

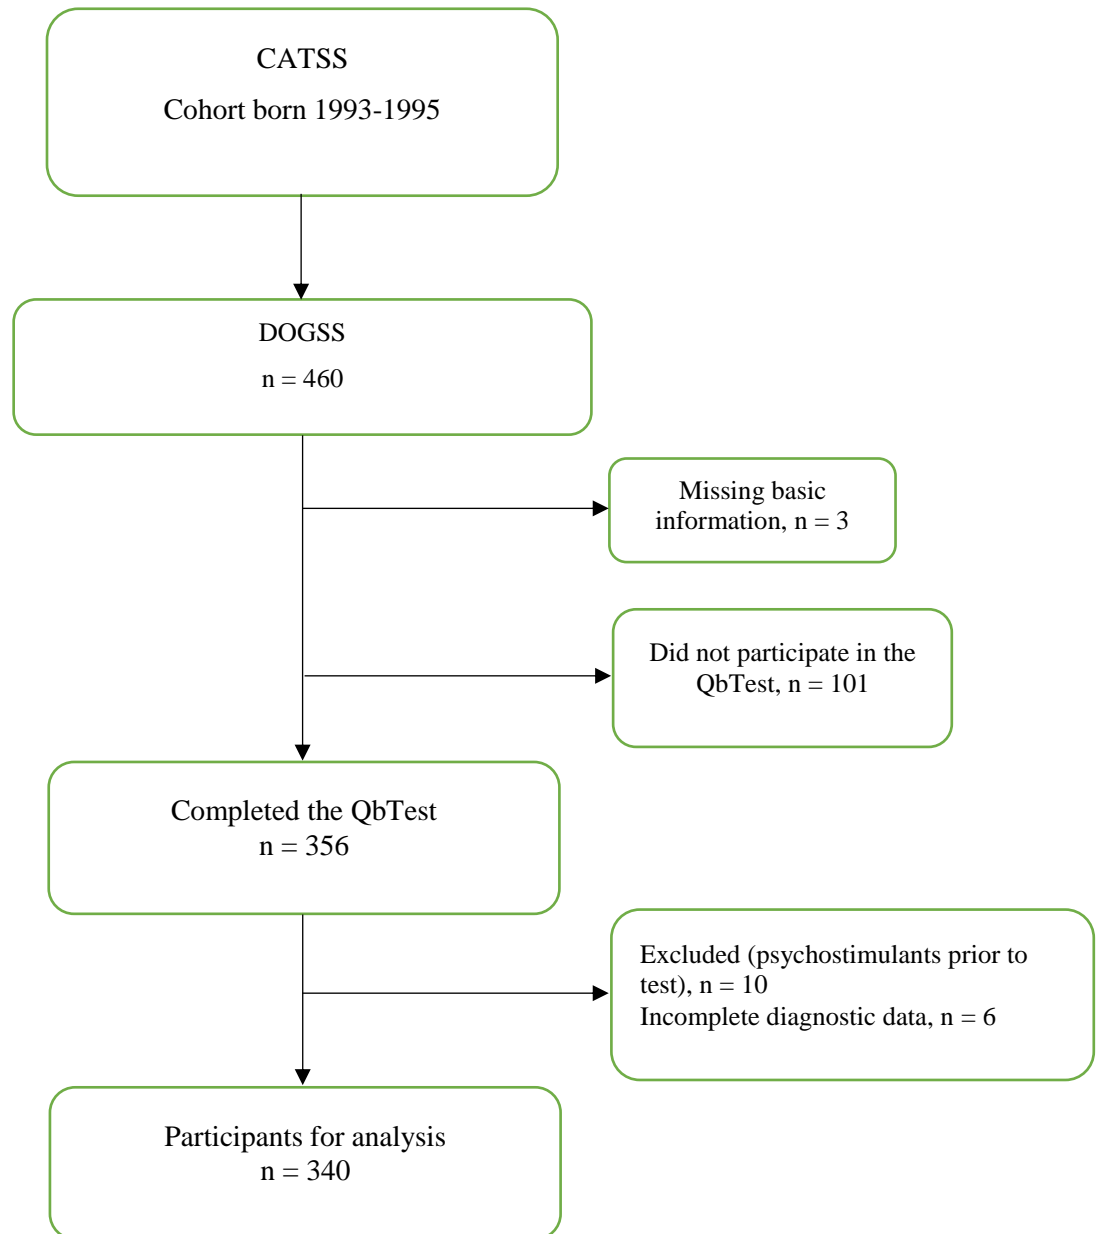

Supplement: Supplementary file 1 [file 12461915]
